# Supplementary material for: Soft X-ray Absorption Spectroscopic Investigation of Li(Ni0.8Co0.1Mn0.1)O2 Cathode Materials
Source: MDPI journal article supplement (doi:10.3390/nano10040759), 2020-04-15
Supplement: s1 [file s1]

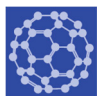

## Supplementary Materials

Soft X-ray Absorption Spectroscopic Investigation of  $\text{Li}(\text{Ni}_{0.8}\text{Co}_{0.1}\text{Mn}_{0.1})\text{O}_2$  Cathode MaterialsJitendra Pal Singh <sup>1</sup>, Jae Yeon Park <sup>2</sup>, Keun Hwa Chae <sup>3</sup>, Docheon Ahn <sup>1,\*</sup> and Sangsul Lee <sup>1,\*</sup>

<sup>1</sup> Pohang Accelerator Laboratory, Pohang University of Science and Technology, Pohang 37673, Korea; jitendra2029@postech.ac.kr

<sup>2</sup> Radiation Equipment Research Division, Korea Atomic Energy Research Institute, Jeongup 56212, Korea; jaeyeon@kaeri.re.kr

<sup>3</sup> Advanced Analysis Center, Korea Institute of Science and Technology, Seoul 02792, Korea; khchae@kist.re.kr

\* Correspondence: sangsul@postech.ac.kr (S.L.); adc4055@postech.ac.kr (D.A.) Tel.: +82-54-279-1569 (S.L.)

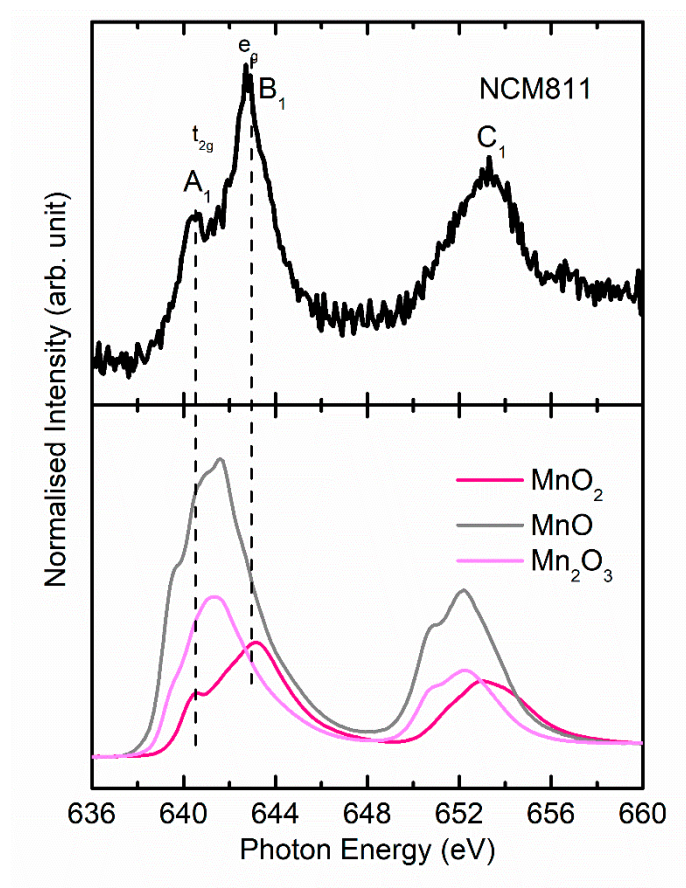

**Figure S1:** Mn L-edge spectrum of NCM811 cathode material along with reference oxide

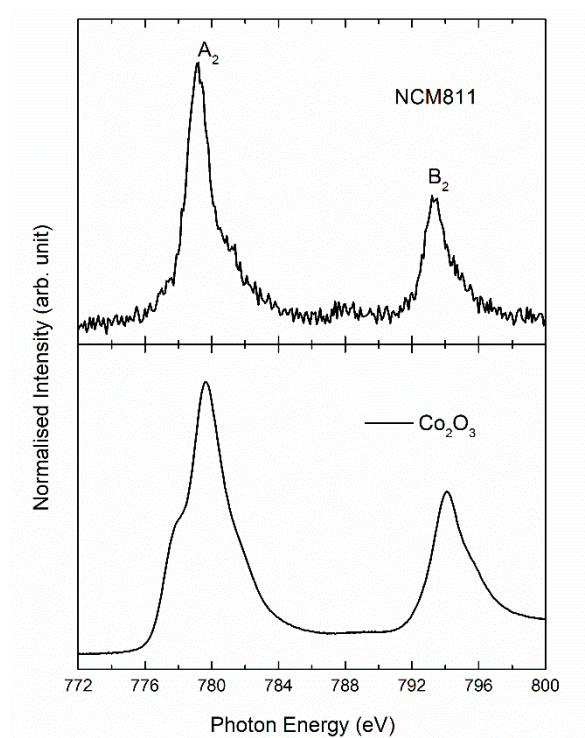

**Figure S2:** Co L-edge spectrum of NCM811 cathode material along with reference oxide.

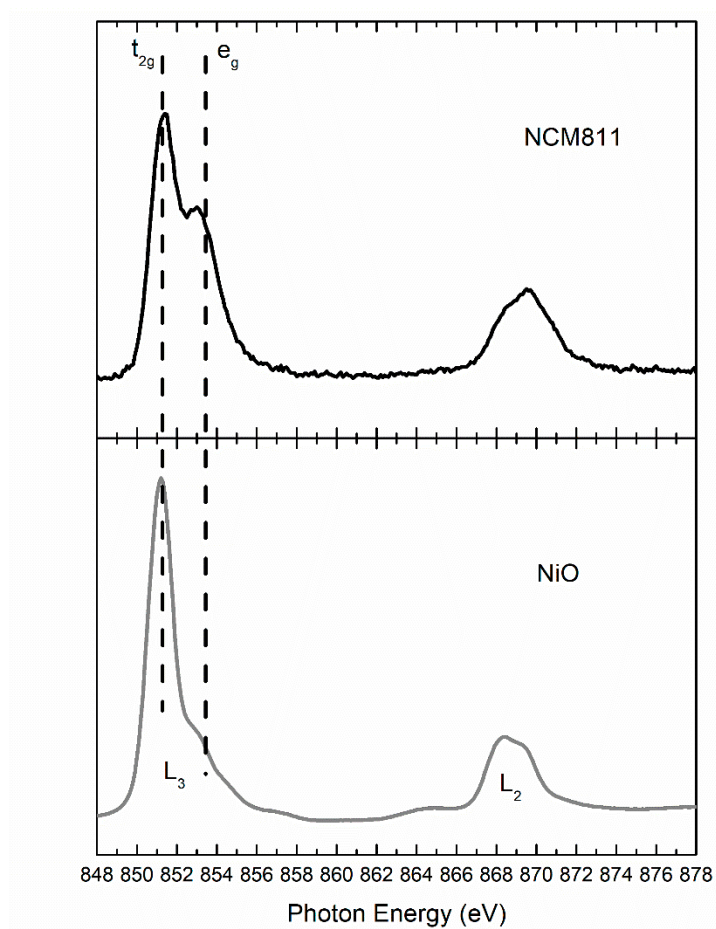

**Figure S3:** Ni L-edge spectrum of NCM811 cathode material along NiO.

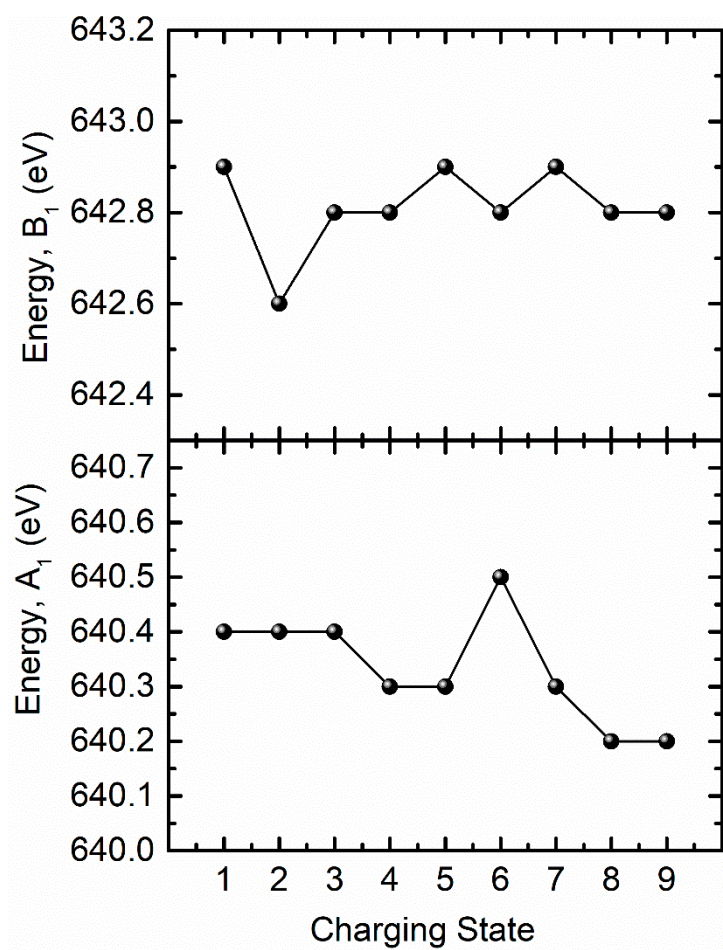

**Figure S4:** Positions of spectral features  $A_1$ , and  $B_1$  of Mn  $L$ -edge spectra for various states. These spectral features are corresponding to  $t_{2g}$  and  $e_g$  states.

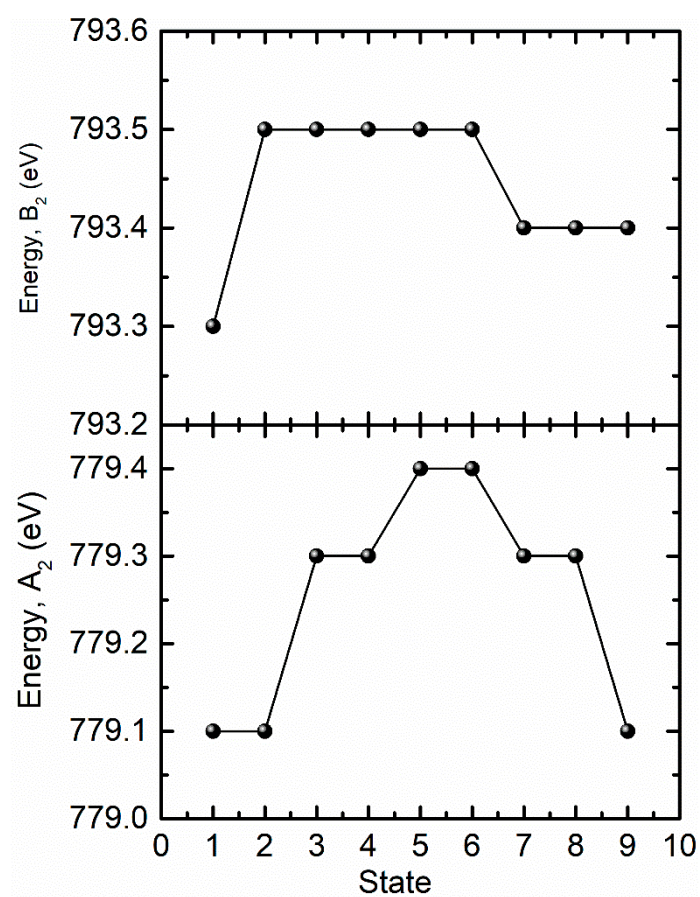

**Figure S5:** Positions of spectral features  $A_2$ , and  $B_2$  of Co  $L$ -edge spectra for various states.
